# Supplementary material for: Author Correction: Effectiveness and Safety of a Novel Care Model for the Management of Type 2 Diabetes at 1 Year: An Open-Label, Non-Randomized, Controlled Study
Source: PubMed Central journal article supplement (PMC6104276; doi:10.1007/s13300-018-0386-4), 2018-03-05
Supplement: 13300_2018_386_MOESM1_ESM.pdf [file 13300_2018_386_MOESM1_ESM.pdf]

**Table S1. Baseline characteristics of the recruited sample, completers, and participants with missing data by treatment arm.**

|                                        | All |                       | Completers with data |                       | Dropout or missing data |                       | Completers-Dropouts |
|----------------------------------------|-----|-----------------------|----------------------|-----------------------|-------------------------|-----------------------|---------------------|
|                                        | N   | Mean (SD) or $\pm$ SE | N                    | Mean (SD) or $\pm$ SE | N                       | Mean (SD) or $\pm$ SE | Mean $\pm$ SE       |
| <b>Age (years)</b>                     |     |                       |                      |                       |                         |                       |                     |
| All                                    | 349 | 53.4 (8.67)           | 296                  | 53.46 (8.75)          | 53                      | 53.06 (8.25)          | 0.4 $\pm$ 1.24      |
| CCI-all education <sup>a</sup>         | 262 | 53.75 (8.35)          | 218                  | 54.09 (8.35)          | 44                      | 52.09 (8.25)          | 2.0 $\pm$ 1.37      |
| CCI-web <sup>a</sup>                   | 126 | 53.39 (8.19)          | 104                  | 53.49 (8.23)          | 22                      | 51.27 (8.44)          | 0.58 $\pm$ 1.92     |
| CCI-onsite <sup>a</sup>                | 136 | 54.09 (8.52)          | 114                  | 54.63 (8.47)          | 9                       | 57.78 (6.85)          | 3.36 $\pm$ 1.97     |
| Usual care <sup>a</sup>                | 87  | 52.33 (9.52)          | 78                   | 51.71 (9.62)          | 9                       | 57.78 (6.85)          | -6.07 $\pm$ 2.53*   |
| CCI-web vs. CCI-onsite <sup>b</sup>    |     | -0.7 $\pm$ 1.03       |                      | -1.14 $\pm$ 1.13      |                         | 1.64 $\pm$ 2.5        |                     |
| CCI-web vs. usual care <sup>b</sup>    |     | 1.06 $\pm$ 1.25       |                      | 1.79 $\pm$ 1.36       |                         | -4.87 $\pm$ 2.87      |                     |
| CCI-onsite vs. usual care <sup>b</sup> |     | 1.75 $\pm$ 1.26       |                      | 2.93 $\pm$ 1.35       |                         | -6.51 $\pm$ 2.91      |                     |
| CCI-all vs. usual care <sup>b</sup>    |     | 1.42 $\pm$ 1.14       |                      | 2.38 $\pm$ 1.23*      |                         | -5.69 $\pm$ 2.6*      |                     |
| <b>Female (%)</b>                      |     |                       |                      |                       |                         |                       |                     |
| All                                    | 349 | 64.76 $\pm$ 2.55      | 296                  | 63.85 $\pm$ 2.79      | 53                      | 69.81 $\pm$ 6.31      | -5.96 $\pm$ 6.9     |
| CCI-all education <sup>a</sup>         | 262 | 66.79 $\pm$ 2.91      | 218                  | 65.14 $\pm$ 3.23      | 44                      | 75.0 $\pm$ 6.53       | -9.86 $\pm$ 7.28    |
| CCI-web <sup>a</sup>                   | 126 | 61.9 $\pm$ 4.33       | 104                  | 57.69 $\pm$ 4.84      | 22                      | 81.82 $\pm$ 8.22      | -24.13 $\pm$ 9.54*  |
| CCI-onsite <sup>a</sup>                | 136 | 71.32 $\pm$ 3.88      | 114                  | 71.93 $\pm$ 4.21      | 22                      | 68.18 $\pm$ 9.93      | 3.75 $\pm$ 10.79    |
| Usual care <sup>a</sup>                | 87  | 58.62 $\pm$ 5.28      | 78                   | 60.26 $\pm$ 5.54      | 9                       | 44.44 $\pm$ 16.56     | 15.81 $\pm$ 17.47   |
| CCI-web vs. CCI-onsite <sup>b</sup>    |     | -9.42 $\pm$ 5.81      |                      | -14.24 $\pm$ 6.42*    |                         | 13.64 $\pm$ 12.89     |                     |
| CCI-web vs. usual care <sup>b</sup>    |     | 3.28 $\pm$ 6.83       |                      | -2.56 $\pm$ 7.36      |                         | 37.37 $\pm$ 18.49*    |                     |
| CCI-onsite vs. usual care <sup>b</sup> |     | 12.7 $\pm$ 6.55*      |                      | 11.67 $\pm$ 6.96      |                         | 23.74 $\pm$ 19.31     |                     |
| CCI-all vs. usual care <sup>b</sup>    |     | 8.17 $\pm$ 6.03       |                      | 4.88 $\pm$ 6.41       |                         | 30.56 $\pm$ 17.8      |                     |
| <b>African American (%)</b>            |     |                       |                      |                       |                         |                       |                     |
| All                                    | 349 | 5.16 $\pm$ 1.18       | 296                  | 4.39 $\pm$ 1.19       | 53                      | 9.43 $\pm$ 4.02       | -5.04 $\pm$ 4.19    |
| CCI-all education <sup>a</sup>         | 262 | 6.87 $\pm$ 1.56       | 218                  | 5.96 $\pm$ 1.6        | 44                      | 11.36 $\pm$ 4.78      | -5.4 $\pm$ 5.05     |
| CCI-web <sup>a</sup>                   | 126 | 5.56 $\pm$ 2.04       | 104                  | 5.77 $\pm$ 2.29       | 22                      | 4.55 $\pm$ 4.44       | 1.22 $\pm$ 4.99     |
| CCI-onsite <sup>a</sup>                | 136 | 8.09 $\pm$ 2.34       | 114                  | 6.14 $\pm$ 2.25       | 22                      | 18.18 $\pm$ 8.22      | -12.04 $\pm$ 8.52   |
| Usual care <sup>a</sup>                | 87  | 0.0 $\pm$ 0.0         | 78                   | 0.0 $\pm$ 0.0         | 9                       | 0.0 $\pm$ 0.0         | 0.0 $\pm$ 0.0       |
| CCI-web vs. CCI-onsite <sup>b</sup>    |     | -2.53 $\pm$ 3.1       |                      | -0.37 $\pm$ 3.21      |                         | -13.64 $\pm$ 9.35     |                     |
| CCI-web vs. usual care <sup>b</sup>    |     | 5.56 $\pm$ 2.04†      |                      | 5.77 $\pm$ 2.29*      |                         | 4.55 $\pm$ 4.44       |                     |
| CCI-onsite vs. usual care <sup>b</sup> |     | 8.09 $\pm$ 2.34‡      |                      | 6.14 $\pm$ 2.25†      |                         | 18.18 $\pm$ 8.22*     |                     |
| CCI-all vs. usual care <sup>b</sup>    |     | 6.87 $\pm$ 1.56§      |                      | 5.96 $\pm$ 1.6‡       |                         | 11.36 $\pm$ 4.78*     |                     |

**Years with type 2 diabetes**

|                                        |     |              |     |              |    |               |              |
|----------------------------------------|-----|--------------|-----|--------------|----|---------------|--------------|
| All                                    | 332 | 8.31 (7.23)  | 288 | 8.26 (7.28)  | 44 | 8.61 (6.97)   | -0.35 ± 1.13 |
| CCI-all education <sup>a</sup>         | 261 | 8.44 (7.22)  | 217 | 8.4 (7.28)   | 44 | 8.61 (6.97)   | -0.21 ± 1.16 |
| CCI-web <sup>a</sup>                   | 126 | 7.88 (6.79)  | 104 | 7.95 (7.03)  | 22 | 7.55 (5.65)   | 0.41 ± 1.39  |
| CCI-onsite <sup>a</sup>                | 135 | 8.96 (7.58)  | 113 | 8.81 (7.51)  | 22 | 9.68 (8.07)   | -0.87 ± 1.86 |
| Usual care <sup>a</sup>                | 71  | 7.85 (7.32)  | 71  | 7.85 (7.32)  |    | Not collected |              |
| CCI-web vs. CCI-onsite <sup>b</sup>    |     | -1.07 ± 0.89 |     | -0.86 ± 0.99 |    |               | -2.14 ± 2.1  |
| CCI-web vs. usual care <sup>b</sup>    |     | 0.04 ± 1.06  |     | 0.11 ± 1.11  |    |               |              |
| CCI-onsite vs. usual care <sup>b</sup> |     | 1.11 ± 1.09  |     | 0.97 ± 1.12  |    |               |              |
| CCI-all vs. usual care <sup>b</sup>    |     | 0.59 (0.9)   |     | 0.56 ± 1.0   |    |               |              |

**Beta-hydroxybutyrate (mmol·L<sup>-1</sup>)**

|                                        |     |             |     |             |    |             |              |
|----------------------------------------|-----|-------------|-----|-------------|----|-------------|--------------|
| All                                    | 327 | 0.17 (0.15) | 245 | 0.16 (0.14) | 82 | 0.19 (0.16) | -0.02 ± 0.02 |
| CCI-all education <sup>a</sup>         | 248 | 0.17 (0.15) | 186 | 0.17 (0.15) | 62 | 0.19 (0.16) | -0.02 ± 0.02 |
| CCI-web <sup>a</sup>                   | 120 | 0.18 (0.15) | 88  | 0.18 (0.15) | 32 | 0.21 (0.16) | -0.03 ± 0.03 |
| CCI-onsite <sup>a</sup>                | 128 | 0.16 (0.16) | 98  | 0.16 (0.15) | 30 | 0.17 (0.16) | -0.01 ± 0.04 |
| Usual care <sup>a</sup>                | 79  | 0.15 (0.13) | 59  | 0.14 (0.12) | 20 | 0.17 (0.15) | -0.03 ± 0.03 |
| CCI-web vs. CCI-onsite <sup>b</sup>    |     | 0.02 ± 0.02 |     | 0.01 ± 0.03 |    | 0.03 ± 0.04 |              |
| CCI-web vs. usual care <sup>b</sup>    |     | 0.03 ± 0.02 |     | 0.03 ± 0.03 |    | 0.03 ± 0.04 |              |
| CCI-onsite vs. usual care <sup>b</sup> |     | 0.01 ± 0.02 |     | 0.02 ± 0.03 |    | 0.0 ± 0.04  |              |
| CCI-all vs. usual care <sup>b</sup>    |     | 0.02 ± 0.02 |     | 0.02 ± 0.02 |    | 0.02 ± 0.04 |              |

**Hemoglobin A<sub>1c</sub> (mmol·mol<sup>-1</sup>)**

|                                        |     |               |     |               |    |               |               |
|----------------------------------------|-----|---------------|-----|---------------|----|---------------|---------------|
| All                                    | 349 | 59.66 (17.16) | 276 | 59.11 (16.62) | 73 | 61.63 (18.91) | -26.04 ± 2.4  |
| CCI-all education <sup>a</sup>         | 262 | 59.55 (16.4)  | 204 | 58.35 (15.3)  | 58 | 63.49 (19.57) | -28.66 ± 2.73 |
| CCI-web <sup>a</sup>                   | 126 | 58.68 (15.41) | 98  | 57.69 (13.99) | 28 | 61.85 (19.46) | -27.57 ± 3.94 |
| CCI-onsite <sup>a</sup>                | 136 | 60.32 (17.38) | 106 | 59.01 (16.51) | 30 | 65.02 (19.89) | -29.65 ± 3.94 |
| Usual care <sup>a</sup>                | 87  | 59.99 (19.24) | 72  | 61.08 (19.89) | 15 | 54.52 (14.87) | -16.97 ± 4.48 |
| CCI-web vs. CCI-onsite <sup>b</sup>    |     | -1.64 ± 2.08  |     | -1.2 ± 2.19   |    | -3.28 ± 5.14  |               |
| CCI-web vs. usual care <sup>b</sup>    |     | -1.31 ± 2.51  |     | -3.39 ± 2.73  |    | 7.32 ± 5.25   |               |
| CCI-onsite vs. usual care <sup>b</sup> |     | 0.33 ± 2.51   |     | -2.19 ± 2.84  |    | 10.6 ± 5.25*  |               |
| CCI-all vs. usual care <sup>b</sup>    |     | -0.44 ± 2.3   |     | -2.73 ± 2.62  |    | 8.96 ± 4.59*  |               |

**Hemoglobin A<sub>1c</sub> (%)**

|                                     |     |              |     |             |    |             |              |
|-------------------------------------|-----|--------------|-----|-------------|----|-------------|--------------|
| All                                 | 349 | 7.61 (1.57)  | 276 | 7.56 (1.52) | 73 | 7.79 (1.73) | -0.23 ± 0.22 |
| CCI-all education <sup>a</sup>      | 262 | 7.60 (1.50)  | 204 | 7.49 (1.4)  | 58 | 7.96 (1.79) | -0.47 ± 0.25 |
| CCI-web <sup>a</sup>                | 126 | 7.52 (1.41)  | 98  | 7.43 (1.28) | 28 | 7.81 (1.78) | -0.37 ± 0.36 |
| CCI-onsite <sup>a</sup>             | 136 | 7.67 (1.59)  | 106 | 7.55 (1.51) | 30 | 8.10 (1.82) | -0.56 ± 0.36 |
| Usual care <sup>a</sup>             | 87  | 7.64 (1.76)  | 72  | 7.74 (1.82) | 15 | 7.14 (1.36) | 0.60 ± 0.41  |
| CCI-web vs. CCI-onsite <sup>b</sup> |     | -0.15 ± 0.19 |     | -0.11 ± 0.2 |    | -0.3 ± 0.47 |              |

|                                                                 |     |                                        |                 |                 |                |                 |                  |  |
|-----------------------------------------------------------------|-----|----------------------------------------|-----------------|-----------------|----------------|-----------------|------------------|--|
|                                                                 |     | CCI-web vs. usual care <sup>b</sup>    | -0.12 ± 0.23    |                 | -0.31 ± 0.25   |                 | 0.67 ± 0.48      |  |
|                                                                 |     | CCI-onsite vs. usual care <sup>b</sup> | 0.03 ± 0.23     |                 | -0.2 ± 0.26    |                 | 0.97 ± 0.48*     |  |
|                                                                 |     | CCI-all vs. usual care <sup>b</sup>    | -0.04 ± 0.21    |                 | -0.25 ± 0.24   |                 | 0.82 ± 0.42*     |  |
| <b>Fasting glucose (mmol·L<sup>-1</sup>)</b>                    |     |                                        |                 |                 |                |                 |                  |  |
| All                                                             | 344 | 8.86 (3.57)                            | 273             | 8.78 (3.46)     | 71             | 9.18 (3.96)     | -0.4 ± 0.52      |  |
| CCI-all education <sup>a</sup>                                  | 258 | 8.92 (3.41)                            | 202             | 8.8 (3.28)      | 56             | 9.36 (3.83)     | -0.55 ± 0.56     |  |
| CCI-web <sup>a</sup>                                            | 123 | 8.61 (3.12)                            | 97              | 8.5 (3.05)      | 26             | 9.04 (3.41)     | -0.54 ± 0.74     |  |
| CCI-onsite <sup>a</sup>                                         | 135 | 9.2 (3.64)                             | 105             | 9.08 (3.47)     | 30             | 9.63 (4.21)     | -0.55 ± 0.84     |  |
| Usual care <sup>a</sup>                                         | 86  | 8.67 (4.03)                            | 71              | 8.71 (3.96)     | 15             | 8.5 (4.5)       | 0.21 ± 1.25      |  |
|                                                                 |     | CCI-web vs. CCI-onsite <sup>b</sup>    | -0.59 ± 0.42    |                 | -0.58 ± 0.46   |                 | -0.59 ± 1.02     |  |
|                                                                 |     | CCI-web vs. usual care <sup>b</sup>    | -0.05 ± 0.52    |                 | -0.21 ± 0.56   |                 | 0.54 ± 1.34      |  |
|                                                                 |     | CCI-onsite vs. usual care <sup>b</sup> | 0.54 ± 0.54     |                 | 0.38 ± 0.58    |                 | 1.13 ± 1.39      |  |
|                                                                 |     | CCI-all vs. usual care <sup>b</sup>    | 0.25 ± 0.48     |                 | 0.1 ± 0.52     |                 | 0.86 ± 1.27      |  |
| <b>Insulin all (pmol·L<sup>-1</sup>)</b>                        |     |                                        |                 |                 |                |                 |                  |  |
| All                                                             | 327 | 199.25 (167.24)                        | 245             | 199.81 (172.03) | 82             | 197.59 (153.0)  | 2.22 ± 20.14     |  |
| CCI-all education <sup>a</sup>                                  | 248 | 198.35 (165.85)                        | 186             | 197.65 (167.17) | 62             | 200.5 (163.21)  | -2.85 ± 24.1     |  |
| CCI-web <sup>a</sup>                                            | 120 | 168.07 (110.49)                        | 88              | 175.99 (121.05) | 32             | 146.26 (71.53)  | 29.72 ± 18.06    |  |
| CCI-onsite <sup>a</sup>                                         | 128 | 226.68 (200.92)                        | 98              | 217.03 (198.35) | 30             | 258.28 (209.46) | -41.25 ± 43.2    |  |
| Usual care <sup>a</sup>                                         | 79  | 202.17 (172.58)                        | 59              | 206.68 (187.93) | 20             | 188.77 (119.18) | 17.99 ± 36.18    |  |
|                                                                 |     | CCI-web vs. CCI-onsite <sup>b</sup>    | -58.62 ± 20.42† |                 | -41.04 ± 23.82 |                 | -112.02 ± 40.28† |  |
|                                                                 |     | CCI-web vs. usual care <sup>b</sup>    | -34.1 ± 21.88   |                 | -30.7 ± 27.64  |                 | -42.5 ± 29.52    |  |
|                                                                 |     | CCI-onsite vs. usual care <sup>b</sup> | 24.59 ± 26.32   |                 | 10.35 ± 31.6   |                 | 69.59 ± 46.6     |  |
|                                                                 |     | CCI-all vs. usual care <sup>b</sup>    | -3.82 ± 22.09   |                 | -9.1 ± 27.36   |                 | 11.74 ± 33.75    |  |
| <b>Insulin, excluding exogenous users (pmol·L<sup>-1</sup>)</b> |     |                                        |                 |                 |                |                 |                  |  |
| All                                                             | 219 | 202.86 (167.51)                        | 160             | 202.79 (174.46) | 59             | 203.0 (148.21)  | -0.14 ± 23.75    |  |
| CCI-all education <sup>a</sup>                                  | 176 | 204.04 (165.01)                        | 135             | 203.42 (170.22) | 41             | 205.99 (148.55) | -2.57 ± 27.43    |  |
| CCI-web <sup>a</sup>                                            | 84  | 171.68 (100.98)                        | 60              | 178.63 (110.36) | 24             | 154.46 (71.53)  | 24.17 ± 20.42    |  |
| CCI-onsite <sup>a</sup>                                         | 92  | 233.56 (203.0)                         | 75              | 223.28 (204.6)  | 17             | 278.77 (195.43) | -55.49 ± 52.99   |  |
| Usual care <sup>a</sup>                                         | 43  | 198.14 (179.18)                        | 25              | 199.6 (199.81)  | 18             | 196.13 (151.61) | 3.47 ± 53.62     |  |
|                                                                 |     | CCI-web vs. CCI-onsite <sup>b</sup>    | -61.81 ± 23.89† |                 | -44.66 ± 27.57 |                 | -124.25 ± 49.59† |  |
|                                                                 |     | CCI-web vs. usual care <sup>b</sup>    | -26.39 ± 29.45  |                 | -20.97 ± 42.43 |                 | -41.67 ± 38.61   |  |
|                                                                 |     | CCI-onsite vs. usual care <sup>b</sup> | 35.42 ± 34.59   |                 | 23.68 ± 46.39  |                 | 82.65 ± 59.45    |  |
|                                                                 |     | CCI-all vs. usual care <sup>b</sup>    | 5.9 ± 30.0      |                 | 3.89 ± 42.57   |                 | 9.86 ± 42.57     |  |
| <b>C-peptide (nmol·L<sup>-1</sup>)</b>                          |     |                                        |                 |                 |                |                 |                  |  |
| All                                                             | 326 | 1.43 (0.74)                            | 244             | 1.44 (0.74)     | 82             | 1.42 (0.72)     | 0.02 ± 0.09      |  |
| CCI-all education <sup>a</sup>                                  | 247 | 1.45 (0.71)                            | 185             | 1.47 (0.72)     | 62             | 1.39 (0.69)     | 0.07 ± 0.1       |  |

|                                        |     |              |    |              |    |              |              |
|----------------------------------------|-----|--------------|----|--------------|----|--------------|--------------|
| CCI-web <sup>a</sup>                   | 120 | 1.38 (0.68)  | 88 | 1.4 (0.74)   | 32 | 1.32 (0.46)  | 0.07 ± 0.11  |
| CCI-onsite <sup>a</sup>                | 127 | 1.52 (0.73)  | 97 | 1.53 (0.69)  | 30 | 1.47 (0.87)  | 0.06 ± 0.17  |
| Usual care <sup>a</sup>                | 79  | 1.38 (0.82)  | 59 | 1.35 (0.82)  | 20 | 1.49 (0.84)  | -0.14 ± 0.22 |
| CCI-web vs. CCI-onsite <sup>b</sup>    |     | -0.14 ± 0.09 |    | -0.13 ± 0.11 |    | -0.15 ± 0.18 |              |
| CCI-web vs. usual care <sup>b</sup>    |     | -0.01 ± 0.11 |    | 0.05 ± 0.13  |    | -0.16 ± 0.21 |              |
| CCI-onsite vs. usual care <sup>b</sup> |     | 0.13 ± 0.11  |    | 0.18 ± 0.13  |    | -0.02 ± 0.24 |              |
| CCI-all vs. usual care <sup>b</sup>    |     | 0.07 ± 0.1   |    | 0.12 ± 0.12  |    | -0.09 ± 0.21 |              |

#### HOMA-IR (insulin derived), all

|                                        |     |                           |     |               |    |                           |              |
|----------------------------------------|-----|---------------------------|-----|---------------|----|---------------------------|--------------|
| All                                    | 322 | 11.52 (12.28)             | 235 | 11.22 (12.14) | 87 | 12.34 (12.7)              | -1.12 ± 1.57 |
| CCI-all education <sup>a</sup>         | 244 | 11.8 (13.14)              | 179 | 11.19 (12.75) | 65 | 13.48 (14.12)             | -2.3 ± 1.99  |
| CCI-web <sup>a</sup>                   | 117 | 9.59 (8.37)               | 84  | 9.9 (9.26)    | 33 | 8.8 (5.54)                | 1.1 ± 1.4    |
| CCI-onsite <sup>a</sup>                | 127 | 13.84 (16.11)             | 95  | 12.33 (15.14) | 32 | 18.32 (18.23)             | -5.99 ± 3.58 |
| Usual care <sup>a</sup>                | 78  | 10.64 (9.12)              | 56  | 11.31 (10.05) | 22 | 8.94 (6.03)               | 2.36 ± 1.86  |
| CCI-web vs. CCI-onsite <sup>b</sup>    |     | -4.25 ± 1.63 <sup>†</sup> |     | -2.43 ± 1.85  |    | -9.52 ± 3.36 <sup>†</sup> |              |
| CCI-web vs. usual care <sup>b</sup>    |     | -1.05 ± 1.29              |     | -1.4 ± 1.68   |    | -0.15 ± 1.61              |              |
| CCI-onsite vs. usual care <sup>b</sup> |     | 3.2 ± 1.76                |     | 1.02 ± 2.05   |    | 9.37 ± 3.47 <sup>†</sup>  |              |
| CCI-all vs. usual care <sup>b</sup>    |     | 1.16 ± 1.33               |     | -0.12 ± 1.65  |    | 4.54 ± 2.17               |              |

#### HOMA-IR (insulin derived), excluding exogenous users

|                                        |     |                           |     |               |    |                            |              |
|----------------------------------------|-----|---------------------------|-----|---------------|----|----------------------------|--------------|
| All                                    | 215 | 11.30 (12.96)             | 154 | 10.74 (12.94) | 61 | 12.72 (13.01)              | -1.98 ± 1.97 |
| CCI-all education <sup>a</sup>         | 172 | 11.77 (13.87)             | 129 | 11.00 (13.53) | 43 | 14.09 (14.76)              | -3.08 ± 2.55 |
| CCI-web <sup>a</sup>                   | 81  | 9.08 (7.16)               | 57  | 9.21 (7.82)   | 24 | 8.79 (5.39)                | 0.41 ± 1.51  |
| CCI-onsite <sup>a</sup>                | 91  | 14.17 (17.54)             | 72  | 12.42 (16.65) | 19 | 20.77 (19.66)              | -8.35 ± 4.92 |
| Usual care <sup>a</sup>                | 43  | 9.40 (8.25)               | 25  | 9.36 (9.39)   | 18 | 9.45 (6.61)                | -0.09 ± 2.44 |
| CCI-web vs. CCI-onsite <sup>b</sup>    |     | -5.08 ± 2.00 <sup>*</sup> |     | -3.22 ± 2.22  |    | -11.98 ± 4.64 <sup>†</sup> |              |
| CCI-web vs. usual care <sup>b</sup>    |     | -0.32 ± 1.49              |     | -0.16 ± 2.14  |    | -0.66 ± 1.91               |              |
| CCI-onsite vs. usual care <sup>b</sup> |     | 4.76 ± 2.23 <sup>*</sup>  |     | 3.06 ± 2.72   |    | 11.32 ± 4.77 <sup>*</sup>  |              |
| CCI-all vs. usual care <sup>b</sup>    |     | 2.37 ± 1.64               |     | 1.64 ± 2.22   |    | 4.63 ± 2.74                |              |

#### HOMA-IR (C-peptide derived)

|                                        |     |                           |     |              |    |               |              |
|----------------------------------------|-----|---------------------------|-----|--------------|----|---------------|--------------|
| All                                    | 311 | 11.44 (7.17)              | 217 | 11.25 (6.59) | 94 | 11.87 (8.38)  | -0.63 ± 0.97 |
| CCI-all education <sup>a</sup>         | 244 | 11.52 (7.15)              | 170 | 11.44 (6.26) | 69 | 11.72 (9.04)  | -0.28 ± 1.19 |
| CCI-web <sup>a</sup>                   | 115 | 10.52 (5.72)              | 79  | 10.75 (6.29) | 36 | 10.01 (4.24)  | 0.74 ± 1.00  |
| CCI-onsite <sup>a</sup>                | 124 | 12.45 (8.18)              | 91  | 12.04 (6.20) | 33 | 13.59 (12.13) | -1.55 ± 2.21 |
| Usual care <sup>a</sup>                | 72  | 11.16 (7.26)              | 47  | 10.56 (7.70) | 25 | 12.29 (6.33)  | -1.73 ± 1.69 |
| CCI-web vs. CCI-onsite <sup>b</sup>    |     | -1.93 ± 0.91 <sup>*</sup> |     | -1.29 ± 0.96 |    | -3.58 ± 2.23  |              |
| CCI-web vs. usual care <sup>b</sup>    |     | -0.64 ± 1.01              |     | 0.19 ± 1.33  |    | -2.28 ± 1.45  |              |
| CCI-onsite vs. usual care <sup>b</sup> |     | 1.29 ± 1.13               |     | 1.48 ± 1.30  |    | 1.3 ± 2.46    |              |
| CCI-all vs. usual care <sup>b</sup>    |     | 0.36 ± 0.97               |     | 0.88 ± 1.22  |    | -0.56 ± 1.67  |              |

**Weight-clinic (kg)**

|                                        |     |                           |     |                          |    |                           |              |
|----------------------------------------|-----|---------------------------|-----|--------------------------|----|---------------------------|--------------|
| All                                    | 340 | 113.85 (25.47)            | 253 | 113.06 (24.24)           | 87 | 116.14 (28.77)            | -3.08 ± 3.44 |
| CCI-all education <sup>a</sup>         | 257 | 116.51 (25.94)            | 184 | 115.42 (24.62)           | 73 | 119.25 (29.01)            | -3.83 ± 3.85 |
| CCI-web <sup>a</sup>                   | 121 | 114.58 (27.08)            | 84  | 114.78 (25.87)           | 37 | 114.14 (30.01)            | 0.64 ± 5.68  |
| CCI-onsite <sup>a</sup>                | 136 | 118.22 (24.86)            | 100 | 115.96 (23.63)           | 36 | 124.5 (27.36)             | -8.54 ± 5.14 |
| Usual care <sup>a</sup>                | 83  | 105.63 (22.15)            | 69  | 106.79 (22.18)           | 14 | 99.94 (21.86)             | 6.84 ± 6.42  |
| CCI-web vs. CCI-onsite <sup>b</sup>    |     | -3.64 ± 3.26              |     | -1.18 ± 3.68             |    | -10.36 ± 6.72             |              |
| CCI-web vs. usual care <sup>b</sup>    |     | 8.95 ± 3.46 <sup>†</sup>  |     | 7.99 ± 3.89 <sup>*</sup> |    | 14.2 ± 7.65               |              |
| CCI-onsite vs. usual care <sup>b</sup> |     | 12.58 ± 3.23 <sup>§</sup> |     | 9.17 ± 3.57 <sup>†</sup> |    | 24.55 ± 7.41 <sup>‡</sup> |              |
| CCI-all vs. usual care <sup>b</sup>    |     | 10.87 ± 2.92 <sup>§</sup> |     | 8.63 ± 3.23 <sup>†</sup> |    | 19.3 ± 6.76 <sup>†</sup>  |              |

**Weight-home scale (kg)**

|                                     |     |                |     |                |    |                            |               |
|-------------------------------------|-----|----------------|-----|----------------|----|----------------------------|---------------|
| CCI-all education <sup>a</sup>      | 262 | 116.4 (26.31)  | 218 | 116.29 (25.25) | 44 | 116.94 (31.37)             | -0.64 ± 5.03  |
| CCI-web <sup>a</sup>                | 126 | 114.52 (27.52) | 104 | 116.05 (27.42) | 22 | 107.26 (27.42)             | 8.8 ± 6.44    |
| CCI-onsite <sup>a</sup>             | 136 | 118.14 (25.12) | 114 | 116.51 (23.21) | 22 | 126.61 (32.65)             | -10.11 ± 7.29 |
| CCI-web vs. CCI-onsite <sup>b</sup> |     | -3.62 ± 3.26   |     | -0.45 ± 3.46   |    | -19.36 ± 9.09 <sup>*</sup> |               |

**BMI (kg·m<sup>-2</sup>)**

|                                        |     |                          |     |                          |    |                         |              |
|----------------------------------------|-----|--------------------------|-----|--------------------------|----|-------------------------|--------------|
| All                                    | 340 | 39.52 (8.6)              | 253 | 39.13 (7.89)             | 87 | 40.66 (10.36)           | -1.54 ± 1.22 |
| CCI-all education <sup>a</sup>         | 257 | 40.43 (8.81)             | 184 | 39.87 (7.88)             | 73 | 41.82 (10.75)           | -1.94 ± 1.39 |
| CCI-web <sup>a</sup>                   | 121 | 39.36 (9.12)             | 84  | 38.82 (7.81)             | 37 | 40.6 (11.6)             | -1.79 ± 2.09 |
| CCI-onsite <sup>a</sup>                | 136 | 41.37 (8.44)             | 100 | 40.76 (7.86)             | 36 | 43.06 (9.82)            | -2.3 ± 1.82  |
| Usual care <sup>a</sup>                | 83  | 36.72 (7.26)             | 69  | 37.14 (7.62)             | 14 | 34.66 (4.8)             | 2.48 ± 1.58  |
| CCI-web vs. CCI-onsite <sup>b</sup>    |     | -2.01 ± 1.1              |     | -1.95 ± 1.16             |    | -2.46 ± 2.51            |              |
| CCI-web vs. usual care <sup>b</sup>    |     | 2.64 ± 1.15 <sup>*</sup> |     | 1.68 ± 1.25              |    | 5.94 ± 2.3 <sup>†</sup> |              |
| CCI-onsite vs. usual care <sup>b</sup> |     | 4.65 ± 1.08 <sup>§</sup> |     | 3.62 ± 1.21 <sup>†</sup> |    | 8.4 ± 2.08 <sup>§</sup> |              |
| CCI-all vs. usual care <sup>b</sup>    |     | 3.7 ± 0.97 <sup>‡</sup>  |     | 2.73 ± 1.09 <sup>†</sup> |    | 7.15 ± 1.8 <sup>§</sup> |              |

**Systolic blood pressure (mmHg)**

|                                        |     |                |     |                         |    |                |              |
|----------------------------------------|-----|----------------|-----|-------------------------|----|----------------|--------------|
| All                                    | 339 | 131.44 (13.99) | 254 | 131.51 (14.14)          | 85 | 131.22 (13.6)  | 0.29 ± 1.72  |
| CCI-all education <sup>a</sup>         | 260 | 131.94 (14.09) | 187 | 132.51 (14.54)          | 73 | 130.47 (12.84) | 2.05 ± 1.84  |
| CCI-web <sup>a</sup>                   | 124 | 132.66 (14.15) | 87  | 133.22 (14.78)          | 37 | 131.35 (12.63) | 1.87 ± 2.61  |
| CCI-onsite <sup>a</sup>                | 136 | 131.28 (14.06) | 100 | 131.9 (14.38)           | 36 | 129.56 (13.16) | 2.34 ± 2.62  |
| Usual care <sup>a</sup>                | 79  | 129.8 (13.61)  | 67  | 128.72 (12.65)          | 12 | 135.83 (17.49) | -7.12 ± 5.28 |
| CCI-web vs. CCI-onsite <sup>b</sup>    |     | 1.38 ± 1.75    |     | 1.32 ± 2.14             |    | 1.8 ± 3.02     |              |
| CCI-web vs. usual care <sup>b</sup>    |     | 2.86 ± 1.99    |     | 4.5 ± 2.21 <sup>*</sup> |    | -4.48 ± 5.46   |              |
| CCI-onsite vs. usual care <sup>b</sup> |     | 1.48 ± 1.95    |     | 3.18 ± 2.11             |    | -6.28 ± 5.5    |              |
| CCI-all vs. usual care <sup>b</sup>    |     | 2.14 ± 1.76    |     | 3.8 ± 1.88 <sup>*</sup> |    | -5.37 ± 5.27   |              |

**Diastolic blood pressure (mmHg)**

|                                        |     |              |     |              |    |              |               |
|----------------------------------------|-----|--------------|-----|--------------|----|--------------|---------------|
| All                                    | 339 | 82.07 (8.4)  | 254 | 81.46 (8.04) | 85 | 83.88 (9.2)  | -2.42 ± 1.12* |
| CCI-all education <sup>a</sup>         | 260 | 82.09 (8.25) | 187 | 81.59 (8.05) | 73 | 83.37 (8.67) | -1.78 ± 1.17  |
| CCI-web <sup>a</sup>                   | 124 | 82.6 (8.85)  | 87  | 81.52 (8.27) | 37 | 85.14 (9.74) | -3.62 ± 1.83* |
| CCI-onsite <sup>a</sup>                | 136 | 81.63 (7.67) | 100 | 81.66 (7.9)  | 36 | 81.56 (7.09) | 0.1 ± 1.42    |
| Usual care <sup>a</sup>                | 79  | 82.0 (8.93)  | 67  | 81.1 (8.07)  | 12 | 87.0 (11.95) | -5.9 ± 3.59   |
| CCI-web vs. CCI-onsite <sup>b</sup>    |     | 0.96 ± 1.03  |     | -0.14 ± 1.19 |    | 3.58 ± 1.99  |               |
| CCI-web vs. usual care <sup>b</sup>    |     | 0.6 ± 1.28   |     | 0.41 ± 1.33  |    | -1.86 ± 3.8  |               |
| CCI-onsite vs. usual care <sup>b</sup> |     | -0.37 ± 1.2  |     | 0.56 ± 1.26  |    | -5.44 ± 3.65 |               |
| CCI-all vs. usual care <sup>b</sup>    |     | 0.09 ± 1.13  |     | 0.49 ± 1.15  |    | -3.63 ± 3.6  |               |

**Total cholesterol (mmol·L<sup>-1</sup>)**

|                                        |     |              |     |              |    |              |               |
|----------------------------------------|-----|--------------|-----|--------------|----|--------------|---------------|
| All                                    | 326 | 4.76 (1.09)  | 245 | 4.69 (1.09)  | 81 | 4.96 (1.1)   | -0.28 ± 0.14* |
| CCI-all education <sup>a</sup>         | 247 | 4.76 (1.07)  | 186 | 4.68 (1.03)  | 61 | 4.99 (1.15)  | -0.31 ± 0.17  |
| CCI-web <sup>a</sup>                   | 120 | 4.78 (1.1)   | 88  | 4.59 (1.06)  | 32 | 5.3 (1.07)   | -0.72 ± 0.22‡ |
| CCI-onsite <sup>a</sup>                | 127 | 4.73 (1.03)  | 98  | 4.76 (1.0)   | 29 | 4.65 (1.16)  | 0.11 ± 0.24   |
| Usual care <sup>a</sup>                | 79  | 4.76 (1.19)  | 59  | 4.72 (1.26)  | 20 | 4.88 (0.93)  | -0.16 ± 0.27  |
| CCI-web vs. CCI-onsite <sup>b</sup>    |     | 0.04 ± 0.14  |     | -0.17 ± 0.15 |    | 0.66 ± 0.29* |               |
| CCI-web vs. usual care <sup>b</sup>    |     | 0.02 ± 0.17  |     | -0.13 ± 0.2  |    | 0.42 ± 0.28  |               |
| CCI-onsite vs. usual care <sup>b</sup> |     | -0.03 ± 0.16 |     | 0.04 ± 0.19  |    | -0.24 ± 0.3  |               |
| CCI-all vs. usual care <sup>b</sup>    |     | -0.0 ± 0.15  |     | -0.04 ± 0.18 |    | 0.11 ± 0.26  |               |

**LDL-cholesterol (mmol·L<sup>-1</sup>)**

|                                        |     |             |     |              |    |              |               |
|----------------------------------------|-----|-------------|-----|--------------|----|--------------|---------------|
| All                                    | 302 | 2.65 (0.87) | 220 | 2.59 (0.87)  | 82 | 2.80 (0.85)  | -0.20 ± 0.11  |
| CCI-all education <sup>a</sup>         | 232 | 2.66 (0.85) | 172 | 2.59 (0.84)  | 60 | 2.84 (0.86)  | -0.24 ± 0.13  |
| CCI-web <sup>a</sup>                   | 115 | 2.67 (0.92) | 83  | 2.52 (0.92)  | 32 | 3.07 (0.81)  | -0.55 ± 0.18† |
| CCI-onsite <sup>a</sup>                | 117 | 2.64 (0.78) | 89  | 2.66 (0.76)  | 28 | 2.57 (0.85)  | 0.09 ± 0.18   |
| Usual care <sup>a</sup>                | 70  | 2.63 (0.94) | 48  | 2.60 (0.98)  | 22 | 2.69 (0.85)  | -0.09 ± 0.23  |
| CCI-web vs. CCI-onsite <sup>b</sup>    |     | 0.03 ± 0.11 |     | -0.15 ± 0.13 |    | 0.50 ± 0.21* |               |
| CCI-web vs. usual care <sup>b</sup>    |     | 0.04 ± 0.14 |     | -0.08 ± 0.17 |    | 0.38 ± 0.23  |               |
| CCI-onsite vs. usual care <sup>b</sup> |     | 0.01 ± 0.13 |     | 0.06 ± 0.16  |    | -0.12 ± 0.24 |               |
| CCI-all vs. usual care <sup>b</sup>    |     | 0.03 ± 0.13 |     | -0.01 ± 0.16 |    | 0.14 ± 0.21  |               |

**Apo B (g·L<sup>-1</sup>)**

|                                     |     |             |     |              |    |              |               |
|-------------------------------------|-----|-------------|-----|--------------|----|--------------|---------------|
| All                                 | 327 | 1.06 (0.29) | 245 | 1.04 (0.28)  | 82 | 1.1 (0.29)   | -0.06 ± 0.04  |
| CCI-all education <sup>a</sup>      | 248 | 1.05 (0.29) | 186 | 1.03 (0.28)  | 62 | 1.1 (0.31)   | -0.06 ± 0.04  |
| CCI-web <sup>a</sup>                | 120 | 1.08 (0.3)  | 88  | 1.03 (0.29)  | 32 | 1.21 (0.3)   | -0.18 ± 0.06† |
| CCI-onsite <sup>a</sup>             | 128 | 1.02 (0.27) | 98  | 1.04 (0.27)  | 30 | 0.97 (0.26)  | 0.06 ± 0.06   |
| Usual care <sup>a</sup>             | 79  | 1.07 (0.28) | 59  | 1.06 (0.3)   | 20 | 1.11 (0.24)  | -0.05 ± 0.07  |
| CCI-web vs. CCI-onsite <sup>b</sup> |     | 0.06 ± 0.04 |     | -0.01 ± 0.04 |    | 0.24 ± 0.07‡ |               |

|                                                   |     |                                        |              |                           |              |                           |               |                           |               |
|---------------------------------------------------|-----|----------------------------------------|--------------|---------------------------|--------------|---------------------------|---------------|---------------------------|---------------|
|                                                   |     |                                        |              |                           |              |                           |               |                           |               |
|                                                   |     | CCI-web vs. usual care <sup>b</sup>    | 0.01 ± 0.04  |                           | -0.03 ± 0.05 |                           | 0.11 ± 0.08   |                           |               |
|                                                   |     | CCI-onsite vs. usual care <sup>b</sup> | -0.05 ± 0.04 |                           | -0.02 ± 0.05 |                           | -0.13 ± 0.07  |                           |               |
|                                                   |     | CCI-all vs. usual care <sup>b</sup>    | -0.02 ± 0.04 |                           | -0.02 ± 0.04 |                           | -0.01 ± 0.07  |                           |               |
| <b>HDL-C (mmol·L<sup>-1</sup>)</b>                |     |                                        |              |                           |              |                           |               |                           |               |
| All                                               | 326 | 1.06 (0.34)                            | 245          | 1.06 (0.35)               | 81           | 1.06 (0.31)               | 0.0 ± 0.04    |                           |               |
|                                                   |     | CCI-all education <sup>a</sup>         | 247          | 1.09 (0.35)               | 186          | 1.1 (0.36)                | 61            | 1.08 (0.32)               | 0.02 ± 0.05   |
|                                                   |     | CCI-web <sup>a</sup>                   | 120          | 1.1 (0.33)                | 88           | 1.1 (0.36)                | 32            | 1.1 (0.24)                | -0.0 ± 0.06   |
|                                                   |     | CCI-onsite <sup>a</sup>                | 127          | 1.09 (0.36)               | 98           | 1.1 (0.36)                | 29            | 1.05 (0.39)               | 0.04 ± 0.08   |
|                                                   |     | Usual care <sup>a</sup>                | 79           | 0.97 (0.29)               | 59           | 0.96 (0.29)               | 20            | 1.02 (0.29)               | -0.06 ± 0.08  |
|                                                   |     | CCI-web vs. CCI-onsite <sup>b</sup>    |              | 0.01 ± 0.04               |              | 0.0 ± 0.05                |               | 0.05 ± 0.08               |               |
|                                                   |     | CCI-web vs. usual care <sup>b</sup>    |              | 0.12 ± 0.04 <sup>†</sup>  |              | 0.14 ± 0.05               |               | 0.08 ± 0.08               |               |
|                                                   |     | CCI-onsite vs. usual care <sup>b</sup> |              | 0.11 ± 0.05 <sup>*</sup>  |              | 0.14 ± 0.05 <sup>†</sup>  |               | 0.04 ± 0.1                |               |
|                                                   |     | CCI-all vs. usual care <sup>b</sup>    |              | 0.12 ± 0.04 <sup>†</sup>  |              | 0.14 ± 0.05 <sup>†</sup>  |               | 0.06 ± 0.08               |               |
| <b>Triglycerides (mmol·L<sup>-1</sup>)</b>        |     |                                        |              |                           |              |                           |               |                           |               |
| All                                               | 326 | 2.46 (2.66)                            | 245          | 2.53 (2.97)               | 81           | 2.26 (1.35)               | 0.27 ± 0.24   |                           |               |
|                                                   |     | CCI-all education <sup>a</sup>         | 247          | 2.23 (1.62)               | 186          | 2.27 (1.73)               | 61            | 2.11 (1.25)               | 0.15 ± 0.2    |
|                                                   |     | CCI-web <sup>a</sup>                   | 120          | 2.14 (1.17)               | 88           | 2.16 (1.2)                | 32            | 2.1 (1.1)                 | 0.06 ± 0.23   |
|                                                   |     | CCI-onsite <sup>a</sup>                | 127          | 2.31 (1.95)               | 98           | 2.36 (2.09)               | 29            | 2.13 (1.41)               | 0.23 ± 0.34   |
|                                                   |     | Usual care <sup>a</sup>                | 79           | 3.2 (4.53)                | 59           | 3.36 (5.17)               | 20            | 2.72 (1.56)               | 0.64 ± 0.76   |
|                                                   |     | CCI-web vs. CCI-onsite <sup>b</sup>    |              | -0.16 ± 0.2               |              | -0.2 ± 0.25               |               | -0.03 ± 0.33              |               |
|                                                   |     | CCI-web vs. usual care <sup>b</sup>    |              | -1.05 ± 0.52 <sup>*</sup> |              | -1.2 ± 0.69               |               | -0.62 ± 0.4               |               |
|                                                   |     | CCI-onsite vs. usual care <sup>b</sup> |              | -0.89 ± 0.54 <sup>*</sup> |              | -1.0 ± 0.71               |               | -0.59 ± 0.44              |               |
|                                                   |     | CCI-all vs. usual care <sup>b</sup>    |              | -0.97 ± 0.52 <sup>*</sup> |              | -1.09 ± 0.68              |               | -0.61 ± 0.38 <sup>*</sup> |               |
| <b>Total/HDL-cholesterol</b>                      |     |                                        |              |                           |              |                           |               |                           |               |
| All                                               | 326 | 4.88 (1.92)                            | 245          | 4.84 (2.0)                | 81           | 4.99 (1.66)               | -0.15 ± 0.22  |                           |               |
|                                                   |     | CCI-all education <sup>a</sup>         | 247          | 4.72 (1.7)                | 186          | 4.65 (1.72)               | 61            | 4.93 (1.65)               | -0.28 ± 0.25  |
|                                                   |     | CCI-web <sup>a</sup>                   | 120          | 4.68 (1.54)               | 88           | 4.55 (1.58)               | 32            | 5.02 (1.36)               | -0.47 ± 0.29  |
|                                                   |     | CCI-onsite <sup>a</sup>                | 127          | 4.76 (1.85)               | 98           | 4.74 (1.83)               | 29            | 4.84 (1.94)               | -0.1 ± 0.41   |
|                                                   |     | Usual care <sup>a</sup>                | 79           | 5.37 (2.42)               | 59           | 5.44 (2.63)               | 20            | 5.17 (1.72)               | 0.27 ± 0.52   |
|                                                   |     | CCI-web vs. CCI-onsite <sup>b</sup>    |              | -0.08 ± 0.22              |              | -0.19 ± 0.25              |               | 0.19 ± 0.43               |               |
|                                                   |     | CCI-web vs. usual care <sup>b</sup>    |              | -0.69 ± 0.31 <sup>*</sup> |              | -0.88 ± 0.38 <sup>*</sup> |               | -0.15 ± 0.45              |               |
|                                                   |     | CCI-onsite vs. usual care <sup>b</sup> |              | -0.61 ± 0.32              |              | -0.7 ± 0.39               |               | -0.33 ± 0.53              |               |
|                                                   |     | CCI-all vs. usual care <sup>b</sup>    |              | -0.65 ± 0.29 <sup>*</sup> |              | -0.79 ± 0.36 <sup>*</sup> |               | -0.24 ± 0.44              |               |
| <b>hsC-reactive protein (nmol·L<sup>-1</sup>)</b> |     |                                        |              |                           |              |                           |               |                           |               |
| All                                               | 334 | 82.19 (126.1)                          | 263          | 86.0 (138.29)             | 71           | 68.29 (61.81)             | 17.71 ± 11.24 |                           |               |
|                                                   |     | CCI-all education <sup>a</sup>         | 249          | 81.33 (138.0)             | 193          | 85.62 (153.05)            | 56            | 66.76 (62.1)              | 18.86 ± 13.81 |

|                                        |     |                |    |               |    |                |               |
|----------------------------------------|-----|----------------|----|---------------|----|----------------|---------------|
| CCI-web <sup>a</sup>                   | 126 | 89.43 (183.72) | 98 | 98.38 (98.38) | 28 | 58.1 (58.1)    | 40.29 ± 22.1  |
| CCI-onsite <sup>a</sup>                | 123 | 73.14 (63.53)  | 95 | 72.38 (72.38) | 28 | 75.43 (75.43)  | -3.05 ± 16.1  |
| Usual care <sup>a</sup>                | 85  | 84.67 (82.1)   | 70 | 86.95 (86.95) | 15 | 73.81 (73.81)  | 13.14 ± 19.14 |
| CCI-web vs. CCI-onsite <sup>b</sup>    |     | 16.29 ± 17.33  |    | 25.91 ± 21.71 |    | -17.33 ± 16.57 |               |
| CCI-web vs. usual care <sup>b</sup>    |     | 4.76 ± 18.67   |    | 11.43 ± 23.24 |    | -15.71 ± 17.71 |               |
| CCI-onsite vs. usual care <sup>b</sup> |     | -11.52 ± 10.57 |    | -14.57 ± 11.9 |    | 1.62 ± 22.0    |               |
| CCI-all vs. usual care <sup>b</sup>    |     | -3.24 ± 12.48  |    | -1.33 ± 15.05 |    | -7.05 ± 18.19  |               |

#### ALT (μkat·L<sup>-1</sup>)

|                                        |     |             |     |             |    |              |              |
|----------------------------------------|-----|-------------|-----|-------------|----|--------------|--------------|
| All                                    | 343 | 0.5 (0.37)  | 272 | 0.51 (0.39) | 71 | 0.48 (0.27)  | 0.03 ± 0.04  |
| CCI-all education <sup>a</sup>         | 257 | 0.51 (0.38) | 201 | 0.52 (0.41) | 56 | 0.47 (0.27)  | 0.05 ± 0.05  |
| CCI-web <sup>a</sup>                   | 123 | 0.53 (0.3)  | 97  | 0.56 (0.31) | 26 | 0.45 (0.27)  | 0.11 ± 0.06  |
| CCI-onsite <sup>a</sup>                | 134 | 0.49 (0.44) | 104 | 0.49 (0.48) | 30 | 0.49 (0.27)  | 0.0 ± 0.07   |
| Usual care <sup>a</sup>                | 86  | 0.46 (0.33) | 71  | 0.45 (0.34) | 15 | 0.51 (0.29)  | -0.05 ± 0.09 |
| CCI-web vs. CCI-onsite <sup>b</sup>    |     | 0.04 ± 0.05 |     | 0.06 ± 0.06 |    | -0.04 ± 0.07 |              |
| CCI-web vs. usual care <sup>b</sup>    |     | 0.07 ± 0.04 |     | 0.1 ± 0.05* |    | -0.06 ± 0.09 |              |
| CCI-onsite vs. usual care <sup>b</sup> |     | 0.03 ± 0.05 |     | 0.04 ± 0.06 |    | -0.02 ± 0.09 |              |
| CCI-all vs. usual care <sup>b</sup>    |     | 0.05 ± 0.04 |     | 0.07 ± 0.05 |    | -0.04 ± 0.08 |              |

#### AST (μkat·L<sup>-1</sup>)

|                                        |     |              |     |              |    |              |              |
|----------------------------------------|-----|--------------|-----|--------------|----|--------------|--------------|
| All                                    | 343 | 0.4 (0.27)   | 272 | 0.4 (0.3)    | 71 | 0.37 (0.15)  | 0.03 ± 0.03  |
| CCI-all education <sup>a</sup>         | 257 | 0.4 (0.25)   | 201 | 0.41 (0.28)  | 56 | 0.36 (0.15)  | 0.04 ± 0.03  |
| CCI-web <sup>a</sup>                   | 123 | 0.42 (0.27)  | 97  | 0.44 (0.29)  | 26 | 0.35 (0.17)  | 0.09 ± 0.04  |
| CCI-onsite <sup>a</sup>                | 134 | 0.37 (0.24)  | 104 | 0.37 (0.26)  | 30 | 0.37 (0.14)  | 0.0 ± 0.04   |
| Usual care <sup>a</sup>                | 86  | 0.4 (0.32)   | 71  | 0.39 (0.35)  | 15 | 0.42 (0.16)  | -0.03 ± 0.06 |
| CCI-web vs. CCI-onsite <sup>b</sup>    |     | 0.05 ± 0.03  |     | 0.07 ± 0.04  |    | -0.02 ± 0.04 |              |
| CCI-web vs. usual care <sup>b</sup>    |     | 0.02 ± 0.04  |     | 0.05 ± 0.05  |    | -0.07 ± 0.05 |              |
| CCI-onsite vs. usual care <sup>b</sup> |     | -0.03 ± 0.04 |     | -0.02 ± 0.05 |    | -0.05 ± 0.05 |              |
| CCI-all vs. usual care <sup>b</sup>    |     | -0.0 ± 0.04  |     | 0.01 ± 0.05  |    | -0.06 ± 0.05 |              |

#### Alkaline phosphatase (μkat·L<sup>-1</sup>)

|                                        |     |              |     |              |    |              |              |
|----------------------------------------|-----|--------------|-----|--------------|----|--------------|--------------|
| All                                    | 342 | 1.25 (0.39)  | 271 | 1.26 (0.4)   | 71 | 1.23 (0.36)  | 0.03 ± 0.05  |
| CCI-all education <sup>a</sup>         | 256 | 1.24 (0.37)  | 200 | 1.24 (0.37)  | 56 | 1.23 (0.36)  | 0.01 ± 0.05  |
| CCI-web <sup>a</sup>                   | 123 | 1.22 (0.39)  | 97  | 1.23 (0.4)   | 26 | 1.19 (0.33)  | 0.04 ± 0.08  |
| CCI-onsite <sup>a</sup>                | 133 | 1.25 (0.36)  | 103 | 1.25 (0.35)  | 30 | 1.27 (0.39)  | -0.02 ± 0.08 |
| Usual care <sup>a</sup>                | 86  | 1.29 (0.44)  | 71  | 1.31 (0.45)  | 15 | 1.22 (0.38)  | 0.09 ± 0.11  |
| CCI-web vs. CCI-onsite <sup>b</sup>    |     | -0.03 ± 0.05 |     | -0.02 ± 0.05 |    | -0.08 ± 0.1  |              |
| CCI-web vs. usual care <sup>b</sup>    |     | -0.07 ± 0.06 |     | -0.08 ± 0.07 |    | -0.03 ± 0.12 |              |
| CCI-onsite vs. usual care <sup>b</sup> |     | -0.04 ± 0.06 |     | -0.06 ± 0.06 |    | 0.05 ± 0.12  |              |
| CCI-all vs. usual care <sup>b</sup>    |     | -0.05 ± 0.05 |     | -0.07 ± 0.06 |    | 0.01 ± 0.11  |              |



**Serum creatinine ( $\mu\text{mol}\cdot\text{L}^{-1}$ )**

|                                        |     |                  |     |                  |    |                   |                  |
|----------------------------------------|-----|------------------|-----|------------------|----|-------------------|------------------|
| All                                    | 344 | 78.68 (21.22)    | 273 | 77.79 (20.33)    | 71 | 82.21 (24.75)     | -4.42 $\pm$ 3.54 |
| CCI-all education <sup>a</sup>         | 258 | 77.79 (21.22)    | 202 | 77.79 (20.33)    | 56 | 81.33 (24.75)     | -3.54 $\pm$ 3.54 |
| CCI-web <sup>a</sup>                   | 123 | 76.91 (17.68)    | 97  | 76.91 (18.56)    | 26 | 76.02 (15.91)     | 0.88 $\pm$ 3.54  |
| CCI-onsite <sup>a</sup>                | 135 | 79.56 (23.87)    | 105 | 77.79 (21.22)    | 30 | 85.75 (29.17)     | -7.96 $\pm$ 6.19 |
| Usual care <sup>a</sup>                | 86  | 80.44 (22.1)     | 71  | 78.68 (20.33)    | 15 | 86.63 (25.64)     | -7.07 $\pm$ 7.07 |
| CCI-web vs. CCI-onsite <sup>b</sup>    |     | -2.65 $\pm$ 2.65 |     | -0.88 $\pm$ 2.65 |    | -10.61 $\pm$ 6.19 |                  |
| CCI-web vs. usual care <sup>b</sup>    |     | -3.54 $\pm$ 2.65 |     | -1.77 $\pm$ 2.65 |    | -10.61 $\pm$ 7.07 |                  |
| CCI-onsite vs. usual care <sup>b</sup> |     | -0.88 $\pm$ 3.54 |     | -0.88 $\pm$ 3.54 |    | 0.0 $\pm$ 8.84    |                  |
| CCI-all vs. usual care <sup>b</sup>    |     | -1.77 $\pm$ 2.65 |     | -1.77 $\pm$ 2.65 |    | -5.3 $\pm$ 7.07   |                  |

**BUN ( $\text{mmol}\cdot\text{L}^{-1}$ )**

|                                        |     |                  |     |                  |    |                  |                              |
|----------------------------------------|-----|------------------|-----|------------------|----|------------------|------------------------------|
| All                                    | 344 | 5.95 (2.31)      | 273 | 5.94 (2.08)      | 71 | 6.0 (3.06)       | -0.06 $\pm$ 0.39             |
| CCI-all education <sup>a</sup>         | 258 | 6.03 (2.34)      | 202 | 6.06 (2.15)      | 56 | 5.9 (2.96)       | 0.16 $\pm$ 0.42              |
| CCI-web <sup>a</sup>                   | 123 | 6.02 (1.71)      | 97  | 6.17 (1.81)      | 26 | 5.42 (1.14)      | 0.75 $\pm$ 0.29 <sup>†</sup> |
| CCI-onsite <sup>a</sup>                | 135 | 6.04 (2.8)       | 105 | 5.96 (2.42)      | 30 | 6.32 (3.88)      | -0.36 $\pm$ 0.75             |
| Usual care <sup>a</sup>                | 86  | 5.73 (2.23)      | 71  | 5.59 (1.86)      | 15 | 6.38 (3.52)      | -0.79 $\pm$ 0.94             |
| CCI-web vs. CCI-onsite <sup>b</sup>    |     | -0.02 $\pm$ 0.29 |     | 0.21 $\pm$ 0.3   |    | -0.9 $\pm$ 0.74  |                              |
| CCI-web vs. usual care <sup>b</sup>    |     | 0.29 $\pm$ 0.29  |     | 0.58 $\pm$ 0.29* |    | -0.95 $\pm$ 0.94 |                              |
| CCI-onsite vs. usual care <sup>b</sup> |     | 0.31 $\pm$ 0.34  |     | 0.37 $\pm$ 0.32  |    | -0.06 $\pm$ 1.15 |                              |
| CCI-all vs. usual care <sup>b</sup>    |     | 0.3 $\pm$ 0.28   |     | 0.47 $\pm$ 0.27  |    | -0.47 $\pm$ 0.99 |                              |

**eGFR ( $\text{mL}\cdot\text{s}^{-1}\cdot\text{m}^{-2}$ )**

|                                        |     |                 |     |                 |    |                 |                 |
|----------------------------------------|-----|-----------------|-----|-----------------|----|-----------------|-----------------|
| All                                    | 344 | 1.34 (0.23)     | 273 | 1.34 (0.22)     | 71 | 1.31 (0.26)     | 0.03 $\pm$ 0.03 |
| CCI-all education <sup>a</sup>         | 258 | 1.34 (0.23)     | 202 | 1.35 (0.22)     | 56 | 1.33 (0.25)     | 0.02 $\pm$ 0.04 |
| CCI-web <sup>a</sup>                   | 123 | 1.36 (0.21)     | 97  | 1.37 (0.2)      | 26 | 1.35 (0.23)     | 0.02 $\pm$ 0.05 |
| CCI-onsite <sup>a</sup>                | 135 | 1.33 (0.24)     | 105 | 1.33 (0.24)     | 30 | 1.32 (0.26)     | 0.01 $\pm$ 0.05 |
| Usual care <sup>a</sup>                | 86  | 1.32 (0.23)     | 71  | 1.34 (0.22)     | 15 | 1.26 (0.28)     | 0.08 $\pm$ 0.08 |
| CCI-web vs. CCI-onsite <sup>b</sup>    |     | 0.04 $\pm$ 0.05 |     | 0.04 $\pm$ 0.03 |    | 0.03 $\pm$ 0.07 |                 |
| CCI-web vs. usual care <sup>b</sup>    |     | 0.04 $\pm$ 0.03 |     | 0.03 $\pm$ 0.03 |    | 0.09 $\pm$ 0.09 |                 |
| CCI-onsite vs. usual care <sup>b</sup> |     | 0.0 $\pm$ 0.03  |     | -0.01 (0.01)    |    | 0.06 $\pm$ 0.09 |                 |
| CCI-all vs. usual care <sup>b</sup>    |     | 0.02 $\pm$ 0.03 |     | 0.02 $\pm$ 0.03 |    | 0.03 $\pm$ 0.08 |                 |

**Anion gap ( $\text{mmol}\cdot\text{L}^{-1}$ )**

|                                |     |             |     |             |    |             |                   |
|--------------------------------|-----|-------------|-----|-------------|----|-------------|-------------------|
| All                            | 343 | 6.86 (1.7)  | 272 | 6.82 (1.73) | 71 | 6.99 (1.6)  | -0.16 $\pm$ 0.22  |
| CCI-all education <sup>a</sup> | 257 | 6.83 (1.67) | 201 | 6.79 (1.7)  | 56 | 6.98 (1.53) | -0.19 $\pm$ 0.24  |
| CCI-web <sup>a</sup>           | 123 | 6.93 (1.71) | 97  | 6.97 (1.66) | 26 | 6.77 (1.92) | 0.2 $\pm$ 0.41    |
| CCI-onsite <sup>a</sup>        | 134 | 6.75 (1.63) | 104 | 6.63 (1.74) | 30 | 7.17 (1.09) | -0.54 $\pm$ 0.26* |
| Usual care <sup>a</sup>        | 86  | 6.93 (1.82) | 71  | 6.92 (1.82) | 15 | 7.0 (1.89)  | -0.08 $\pm$ 0.53  |

|                                        |              |              |              |
|----------------------------------------|--------------|--------------|--------------|
| CCI-web vs. CCI-onsite <sup>b</sup>    | 0.18 ± 0.21  | 0.34 ± 0.24  | -0.4 ± 0.43  |
| CCI-web vs. usual care <sup>b</sup>    | 0.0 ± 0.25   | 0.05 ± 0.27  | -0.23 ± 0.62 |
| CCI-onsite vs. usual care <sup>b</sup> | -0.18 ± 0.24 | -0.29 ± 0.27 | 0.17 ± 0.53  |
| CCI-all vs. usual care <sup>b</sup>    | -0.1 ± 0.22  | -0.12 ± 0.25 | -0.02 ± 0.53 |

### CO<sub>2</sub> (mmol·L<sup>-1</sup>)

|                                        |     |              |     |              |    |               |              |
|----------------------------------------|-----|--------------|-----|--------------|----|---------------|--------------|
| All                                    | 344 | 27.86 (2.65) | 273 | 27.97 (2.58) | 71 | 27.42 (2.91)  | 0.55 ± 0.38  |
| CCI-all education <sup>a</sup>         | 258 | 27.78 (2.55) | 202 | 27.95 (2.37) | 56 | 27.18 (3.06)  | 0.77 ± 0.44  |
| CCI-web <sup>a</sup>                   | 123 | 27.9 (2.37)  | 97  | 27.97 (2.15) | 26 | 27.65 (3.1)   | 0.32 ± 0.65  |
| CCI-onsite <sup>a</sup>                | 135 | 27.67 (2.7)  | 105 | 27.92 (2.56) | 30 | 26.77 (3.01)  | 1.16 ± 0.6   |
| Usual care <sup>a</sup>                | 86  | 28.1 (2.95)  | 71  | 28.06 (3.11) | 15 | 28.33 (2.09)  | -0.28 ± 0.65 |
| CCI-web vs. CCI-onsite <sup>b</sup>    |     | 0.24 ± 0.32  |     | 0.05 ± 0.33  |    | 0.89 ± 0.82   |              |
| CCI-web vs. usual care <sup>b</sup>    |     | -0.2 ± 0.38  |     | -0.09 ± 0.43 |    | -0.68 ± 0.81  |              |
| CCI-onsite vs. usual care <sup>b</sup> |     | -0.44 ± 0.39 |     | -0.13 ± 0.45 |    | -1.57 ± 0.77* |              |
| CCI-all vs. usual care <sup>b</sup>    |     | -0.33 ± 0.36 |     | -0.11 ± 0.4  |    | -1.15 ± 0.68  |              |

### Uric acid (μmol·L<sup>-1</sup>)

|                                        |     |                |     |                |    |                |                |
|----------------------------------------|-----|----------------|-----|----------------|----|----------------|----------------|
| All                                    | 346 | 344.42 (86.85) | 273 | 343.82 (86.25) | 73 | 346.2 (91.01)  | -2.38 ± 11.9   |
| CCI-all education <sup>a</sup>         | 261 | 347.99 (86.85) | 202 | 348.58 (86.25) | 59 | 346.2 (89.82)  | 2.38 ± 13.09   |
| CCI-web <sup>a</sup>                   | 126 | 355.13 (87.44) | 98  | 361.07 (89.82) | 28 | 333.71 (77.93) | 27.36 ± 17.25  |
| CCI-onsite <sup>a</sup>                | 135 | 341.44 (85.66) | 104 | 336.69 (80.9)  | 31 | 357.5 (99.34)  | -20.82 ± 19.63 |
| Usual care <sup>a</sup>                | 85  | 333.12 (87.44) | 71  | 330.74 (85.66) | 14 | 345.01 (98.75) | -14.28 ± 28.55 |
| CCI-web vs. CCI-onsite <sup>b</sup>    |     | 13.68 ± 10.71  |     | 24.98 ± 11.9   |    | -23.79 ± 23.2  |                |
| CCI-web vs. usual care <sup>b</sup>    |     | 22.01 ± 12.49  |     | 30.34 ± 13.68* |    | -11.3 ± 30.34  |                |
| CCI-onsite vs. usual care <sup>b</sup> |     | 7.73 ± 11.9    |     | 5.35 ± 13.09*  |    | 12.49 ± 32.12  |                |
| CCI-all vs. usual care <sup>b</sup>    |     | 14.87 ± 10.71  |     | 17.25 ± 11.9   |    | 1.19 ± 29.15   |                |

### TSH (mIU·L<sup>-1</sup>)

|                                        |     |              |     |             |    |              |              |
|----------------------------------------|-----|--------------|-----|-------------|----|--------------|--------------|
| All                                    | 344 | 2.23 (1.62)  | 270 | 2.25 (1.65) | 74 | 2.17 (1.51)  | 0.08 ± 0.2   |
| CCI-all education <sup>a</sup>         | 259 | 2.32 (1.74)  | 200 | 2.31 (1.79) | 59 | 2.38 (1.55)  | -0.07 ± 0.24 |
| CCI-web <sup>a</sup>                   | 126 | 2.37 (1.91)  | 98  | 2.46 (2.11) | 28 | 2.07 (0.91)  | 0.38 ± 0.27  |
| CCI-onsite <sup>a</sup>                | 133 | 2.28 (1.56)  | 102 | 2.16 (1.42) | 31 | 2.65 (1.93)  | -0.49 ± 0.37 |
| Usual care <sup>a</sup>                | 85  | 1.97 (1.16)  | 70  | 2.09 (1.16) | 15 | 1.38 (1.03)  | 0.71 ± 0.3*  |
| CCI-web vs. CCI-onsite <sup>b</sup>    |     | 0.09 ± 0.22  |     | 0.29 ± 0.26 |    | -0.58 ± 0.39 |              |
| CCI-web vs. usual care <sup>b</sup>    |     | 0.4 ± 0.21   |     | 0.36 ± 0.25 |    | 0.69 ± 0.32  |              |
| CCI-onsite vs. usual care <sup>b</sup> |     | 0.31 ± 0.19  |     | 0.07 ± 0.2  |    | 1.27 ± 0.44† |              |
| CCI-all vs. usual care <sup>b</sup>    |     | 0.36 ± 0.17* |     | 0.21 ± 0.19 |    | 1.0 ± 0.33†  |              |

**Free T4 (pmol·L<sup>-1</sup>)**

|                                        |     |              |     |              |    |              |              |
|----------------------------------------|-----|--------------|-----|--------------|----|--------------|--------------|
| All                                    | 346 | 11.71 (2.7)  | 273 | 11.71 (2.83) | 73 | 11.46 (2.19) | 0.26 ± 0.26  |
| CCI-all education <sup>a</sup>         | 260 | 11.84 (2.19) | 202 | 11.84 (2.32) | 58 | 11.58 (2.19) | 0.26 ± 0.39  |
| CCI-web <sup>a</sup>                   | 125 | 11.84 (2.06) | 98  | 11.84 (1.93) | 27 | 12.1 (2.06)  | -0.26 ± 0.51 |
| CCI-onsite <sup>a</sup>                | 135 | 11.84 (2.45) | 104 | 11.97 (2.57) | 31 | 11.2 (2.19)  | 0.77 ± 0.51  |
| Usual care <sup>a</sup>                | 86  | 11.33 (3.73) | 71  | 11.33 (3.86) | 15 | 10.94 (2.32) | 0.39 ± 0.77  |
| CCI-web vs. CCI-onsite <sup>b</sup>    |     | 0.0 ± 0.26   |     | -0.26 ± 0.26 |    | 0.77 ± 0.51  |              |
| CCI-web vs. usual care <sup>b</sup>    |     | 0.51 ± 0.39  |     | 0.51 ± 0.51  |    | 1.03 ± 0.77  |              |
| CCI-onsite vs. usual care <sup>b</sup> |     | 0.51 ± 0.39  |     | 0.64 ± 0.51  |    | 0.26 ± 0.77  |              |
| CCI-all vs. usual care <sup>b</sup>    |     | 0.51 ± 0.39  |     | 0.51 ± 0.51  |    | 0.64 ± 0.64  |              |

**Any diabetes medication, excluding metformin (%)**

|                                        |     |               |     |                |    |               |                 |
|----------------------------------------|-----|---------------|-----|----------------|----|---------------|-----------------|
| All                                    | 349 | 59.31 ± 2.63  | 291 | 58.76 ± 2.89   | 58 | 60.07 ± 6.37  | -3.31 ± 6.99    |
| CCI-all education <sup>a</sup>         | 262 | 56.87 ± 3.06  | 218 | 55.50 ± 3.37   | 44 | 63.64 ± 7.25  | -8.13 ± 8.00    |
| CCI-web <sup>a</sup>                   | 126 | 57.14 ± 4.41  | 104 | 56.73 ± 4.86   | 22 | 59.09 ± 10.48 | -2.36 ± 11.55   |
| CCI-onsite <sup>a</sup>                | 136 | 56.62 ± 4.25  | 114 | 54.39 ± 4.66   | 22 | 68.18 ± 9.93  | -13.80 ± 10.97† |
| Usual care <sup>a</sup>                | 87  | 66.67 ± 5.05  | 73  | 68.49 ± 5.44   | 14 | 57.14 ± 13.23 | 11.35 ± 14.32   |
| CCI-web vs. CCI-onsite <sup>b</sup>    |     | 0.53 ± 6.12   |     | 2.34 ± 6.74    |    | -9.09 ± 14.44 |                 |
| CCI-web vs. usual care <sup>b</sup>    |     | -9.52 ± 6.71  |     | -11.76 ± 7.29  |    | 1.95 ± 16.88  |                 |
| CCI-onsite vs. usual care <sup>b</sup> |     | -10.05 ± 6.60 |     | -14.11 ± 7.16* |    | 11.04 ± 16.54 |                 |
| CCI-all vs. usual care <sup>b</sup>    |     | -9.80 ± 5.91  |     | -12.99 ± 6.39* |    | 6.49 ± 15.08  |                 |

**Sulfonylurea (%)**

|                                        |     |              |     |              |    |                |               |
|----------------------------------------|-----|--------------|-----|--------------|----|----------------|---------------|
| All                                    | 349 | 23.78 ± 2.28 | 291 | 24.05 ± 2.51 | 58 | 22.41 ± 5.48   | 1.64 ± 6.02   |
| CCI-all education <sup>a</sup>         | 262 | 23.66 ± 2.63 | 218 | 24.31 ± 2.91 | 44 | 20.45 ± 6.08   | 3.86 ± 6.74   |
| CCI-web <sup>a</sup>                   | 126 | 23.81 ± 3.79 | 104 | 25.96 ± 4.3  | 22 | 13.64 ± 7.32   | 12.33 ± 8.49  |
| CCI-onsite <sup>a</sup>                | 136 | 23.53 ± 3.64 | 114 | 22.81 ± 3.93 | 22 | 27.27 ± 9.5    | -4.47 ± 10.28 |
| Usual care <sup>a</sup>                | 87  | 24.14 ± 4.59 | 73  | 23.29 ± 4.95 | 14 | 28.57 ± 12.07  | -5.28 ± 13.05 |
| CCI-web vs. CCI-onsite <sup>b</sup>    |     | 0.28 ± 5.26  |     | 3.15 ± 5.82  |    | -13.64 ± 11.99 |               |
| CCI-web vs. usual care <sup>b</sup>    |     | -0.33 ± 5.95 |     | 2.67 ± 6.55  |    | -14.94 ± 14.12 |               |
| CCI-onsite vs. usual care <sup>b</sup> |     | -0.61 ± 5.85 |     | -0.48 ± 6.32 |    | -1.30 ± 15.36  |               |
| CCI-all vs. usual care <sup>b</sup>    |     | -0.48 ± 5.29 |     | 1.02 ± 5.74  |    | -8.12 ± 13.52  |               |

**Insulin (%)**

|                                     |     |              |     |              |    |               |                |
|-------------------------------------|-----|--------------|-----|--------------|----|---------------|----------------|
| All                                 | 349 | 33.81 ± 2.53 | 296 | 34.12 ± 2.76 | 53 | 32.08 ± 6.41  | 2.04 ± 6.98    |
| CCI-all education <sup>a</sup>      | 262 | 29.77 ± 2.82 | 218 | 28.44 ± 3.06 | 44 | 36.36 ± 7.25  | -7.92 ± 7.87   |
| CCI-web <sup>a</sup>                | 126 | 28.57 ± 4.02 | 104 | 27.88 ± 4.4  | 22 | 31.82 ± 9.93  | -3.93 ± 10.86  |
| CCI-onsite <sup>a</sup>             | 136 | 30.88 ± 3.96 | 114 | 28.95 ± 4.25 | 22 | 40.91 ± 10.48 | -11.96 ± 11.31 |
| Usual care <sup>a</sup>             | 87  | 45.98 ± 5.34 | 78  | 50.0 ± 5.66  | 9  | 11.11 ± 10.48 | 38.89 (1.91)‡  |
| CCI-web vs. CCI-onsite <sup>b</sup> |     | -2.31 ± 5.65 |     | -1.06 ± 6.11 |    | -9.09 ± 14.44 |                |

|                                        |                |                |                |
|----------------------------------------|----------------|----------------|----------------|
| CCI-web vs. usual care <sup>b</sup>    | -17.41 ± 6.69† | -22.12 ± 7.17† | 20.71 ± 14.43  |
| CCI-onsite vs. usual care <sup>b</sup> | -15.09 ± 6.65* | -21.05 ± 7.08† | 29.8 ± 14.82*  |
| CCI-all vs. usual care <sup>b</sup>    | -16.21 ± 6.04† | -21.56 ± 6.43‡ | 25.25 ± 12.74* |

### Thiazolidinedione (%)

|                                        |     |              |     |              |    |           |              |
|----------------------------------------|-----|--------------|-----|--------------|----|-----------|--------------|
| All                                    | 349 | 1.43 ± 0.64  | 291 | 1.72 ± 0.76  | 58 | 0.0 ± 0.0 | 1.72 ± 0.76* |
| CCI-all education <sup>a</sup>         | 262 | 1.53 ± 0.76  | 218 | 1.83 ± 0.91  | 44 | 0.0 ± 0.0 | 1.83 ± 0.91* |
| CCI-web <sup>a</sup>                   | 126 | 2.38 ± 1.36  | 104 | 2.88 ± 1.64  | 22 | 0.0 ± 0.0 | 2.88 ± 1.64  |
| CCI-onsite <sup>a</sup>                | 136 | 0.74 ± 0.73  | 114 | 0.88 ± 0.87  | 22 | 0.0 ± 0.0 | 0.88 ± 0.87  |
| Usual care <sup>a</sup>                | 87  | 1.15 ± 1.14  | 73  | 1.37 ± 1.36  | 14 | 0.0 ± 0.0 | 1.37 ± 1.36  |
| CCI-web vs. CCI-onsite <sup>b</sup>    |     | 1.65 ± 1.54  |     | 2.01 ± 1.86  |    | 0.0 ± 0.0 |              |
| CCI-web vs. usual care <sup>b</sup>    |     | 1.23 ± 1.78  |     | 1.51 ± 2.13  |    | 0.0 ± 0.0 |              |
| CCI-onsite vs. usual care <sup>b</sup> |     | -0.41 ± 1.36 |     | -0.49 ± 1.62 |    | 0.0 ± 0.0 |              |
| CCI-all vs. usual care <sup>b</sup>    |     | 0.38 ± 1.37  |     | 0.46 ± 1.64  |    | 0.0 ± 0.0 |              |

### SGLT-2 (%)

|                                        |     |              |     |              |    |              |              |
|----------------------------------------|-----|--------------|-----|--------------|----|--------------|--------------|
| All                                    | 349 | 11.17 ± 1.69 | 291 | 11.68 ± 1.88 | 58 | 8.62 ± 3.69  | 3.06 ± 4.14  |
| CCI-all education <sup>a</sup>         | 262 | 10.31 ± 1.88 | 218 | 10.55 ± 2.08 | 44 | 9.09 ± 4.33  | 1.46 ± 4.81  |
| CCI-web <sup>a</sup>                   | 126 | 7.14 ± 2.29  | 104 | 7.69 ± 2.61  | 22 | 4.55 ± 4.44  | 3.15 ± 5.15  |
| CCI-onsite <sup>a</sup>                | 136 | 13.24 ± 2.91 | 114 | 13.16 ± 3.17 | 22 | 13.64 ± 7.32 | -0.48 ± 7.97 |
| Usual care <sup>a</sup>                | 87  | 13.79 ± 3.7  | 73  | 15.07 ± 4.19 | 14 | 7.14 ± 6.88  | 7.93 ± 8.06  |
| CCI-web vs. CCI-onsite <sup>b</sup>    |     | -6.09 ± 3.7  |     | -5.47 ± 4.1  |    | -9.09 ± 8.56 |              |
| CCI-web vs. usual care <sup>b</sup>    |     | -6.65 ± 4.35 |     | -7.38 ± 4.94 |    | -2.60 ± 8.19 |              |
| CCI-onsite vs. usual care <sup>b</sup> |     | -0.56 ± 4.7  |     | -1.91 ± 5.25 |    | 6.49 ± 10.05 |              |
| CCI-all vs. usual care <sup>b</sup>    |     | -3.48 ± 4.15 |     | -4.52 ± 4.68 |    | 1.95 ± 8.13* |              |

### DPP-4 (%)

|                                        |     |              |     |              |    |              |              |
|----------------------------------------|-----|--------------|-----|--------------|----|--------------|--------------|
| All                                    | 349 | 9.46 ± 1.57  | 291 | 9.62 ± 1.73  | 58 | 8.62 ± 3.69  | 1.00 ± 4.07  |
| CCI-all education <sup>a</sup>         | 262 | 9.92 ± 1.85  | 218 | 10.09 ± 2.04 | 44 | 9.09 ± 4.33  | 1.0 ± 4.79   |
| CCI-web <sup>a</sup>                   | 126 | 10.32 ± 2.71 | 104 | 9.62 ± 2.89  | 22 | 13.64 ± 7.32 | -4.02 ± 7.87 |
| CCI-onsite <sup>a</sup>                | 136 | 9.56 ± 2.52  | 114 | 10.53 ± 2.87 | 22 | 4.55 ± 4.44  | 5.98 ± 5.29  |
| Usual care <sup>a</sup>                | 87  | 8.05 ± 2.92  | 73  | 8.22 ± 3.21  | 14 | 7.14 ± 6.88  | 1.08 ± 7.60  |
| CCI-web vs. CCI-onsite <sup>b</sup>    |     | 0.76 ± 3.7   |     | -0.91 ± 4.08 |    | 9.09 ± 8.56  |              |
| CCI-web vs. usual care <sup>b</sup>    |     | 2.27 ± 3.98  |     | 1.40 ± 4.32  |    | 6.49 ± 10.05 |              |
| CCI-onsite vs. usual care <sup>b</sup> |     | 1.51 ± 3.85  |     | 2.31 ± 4.31  |    | -2.60 ± 8.19 |              |
| CCI-all vs. usual care <sup>b</sup>    |     | 1.87 ± 3.45  |     | 1.87 ± 3.81  |    | 1.95 ± 8.13  |              |

### GLP-1 (%)

|                                |     |              |     |              |    |              |              |
|--------------------------------|-----|--------------|-----|--------------|----|--------------|--------------|
| All                            | 349 | 13.75 ± 1.84 | 291 | 13.75 ± 2.02 | 58 | 13.79 ± 4.53 | -0.05 ± 4.96 |
| CCI-all education <sup>a</sup> | 262 | 13.36 ± 2.1  | 218 | 12.84 ± 2.27 | 44 | 15.91 ± 5.51 | -3.07 ± 5.96 |

|                                        |     |              |     |              |    |               |             |
|----------------------------------------|-----|--------------|-----|--------------|----|---------------|-------------|
| CCI-web <sup>a</sup>                   | 126 | 12.7 ± 2.97  | 104 | 11.54 ± 3.13 | 22 | 18.18 ± 8.22  | -6.64 ± 8.8 |
| CCI-onsite <sup>a</sup>                | 136 | 13.97 ± 2.97 | 114 | 14.04 ± 3.25 | 22 | 13.64 ± 7.32  | 0.4 ± 8.01  |
| Usual care <sup>a</sup>                | 87  | 14.94 ± 3.82 | 73  | 16.44 ± 4.34 | 14 | 7.14 ± 6.88   | 9.30 ± 8.14 |
| CCI-web vs. CCI-onsite <sup>b</sup>    |     | -1.27 ± 4.2  |     | -2.5 ± 4.52  |    | 4.55 ± 11.01  |             |
| CCI-web vs. usual care <sup>b</sup>    |     | -2.24 ± 4.84 |     | -4.90 ± 5.35 |    | 11.04 ± 10.72 |             |
| CCI-onsite vs. usual care <sup>b</sup> |     | -0.97 ± 4.84 |     | -2.40 ± 5.42 |    | 6.49 ± 10.05  |             |
| CCI-all vs. usual care <sup>b</sup>    |     | -1.58 ± 4.36 |     | -3.59 ± 4.89 |    | 8.77 ± 8.82   |             |

### Metformin (%)

|                                        |     |              |     |              |    |               |              |
|----------------------------------------|-----|--------------|-----|--------------|----|---------------|--------------|
| All                                    | 349 | 68.77 ± 2.48 | 291 | 69.07 ± 2.71 | 58 | 67.24 ± 6.16  | 1.83 ± 6.73  |
| CCI-all education <sup>a</sup>         | 262 | 71.37 ± 2.79 | 218 | 71.56 ± 3.06 | 44 | 70.45 ± 6.88  | 1.11 ± 7.53  |
| CCI-web <sup>a</sup>                   | 126 | 69.84 ± 4.09 | 104 | 71.15 ± 4.44 | 22 | 63.64 ± 10.26 | 7.52 ± 11.18 |
| CCI-onsite <sup>a</sup>                | 136 | 72.79 ± 3.82 | 114 | 71.93 ± 4.21 | 22 | 77.27 ± 8.93  | -5.34 ± 9.88 |
| Usual care <sup>a</sup>                | 87  | 60.92 ± 5.23 | 73  | 61.64 ± 5.69 | 14 | 57.14 ± 13.23 | 4.50 ± 14.40 |
| CCI-web vs. CCI-onsite <sup>b</sup>    |     | -2.95 ± 5.59 |     | -0.78 ± 6.12 |    | -13.64 ± 13.6 |              |
| CCI-web vs. usual care <sup>b</sup>    |     | 8.92 ± 6.64  |     | 9.51 ± 7.22  |    | 6.49 ± 16.74  |              |
| CCI-onsite vs. usual care <sup>b</sup> |     | 11.87 ± 6.48 |     | 10.29 ± 7.08 |    | 20.13 ± 15.96 |              |
| CCI-all vs. usual care <sup>b</sup>    |     | 10.45 ± 5.93 |     | 9.92 ± 6.46  |    | 13.31 ± 14.91 |              |

### Statin (%)

|                                        |     |              |     |              |    |                 |                |
|----------------------------------------|-----|--------------|-----|--------------|----|-----------------|----------------|
| All                                    | 349 | 52.15 ± 2.67 | 291 | 52.58 ± 2.93 | 58 | 50.0 ± 6.57     | 2.58 ± 7.19    |
| CCI-all education <sup>a</sup>         | 262 | 50.0 ± 3.09  | 218 | 51.83 ± 3.38 | 44 | 40.91 ± 7.41    | 10.93 ± 8.15   |
| CCI-web <sup>a</sup>                   | 126 | 47.62 ± 4.45 | 104 | 50.96 ± 4.9  | 22 | 31.82 ± 9.93    | 19.14 ± 11.07  |
| CCI-onsite <sup>a</sup>                | 136 | 52.21 ± 4.28 | 114 | 52.63 ± 4.68 | 22 | 50.0 ± 10.66    | 2.63 ± 11.64   |
| Usual care <sup>a</sup>                | 87  | 58.62 ± 5.28 | 73  | 54.79 ± 5.83 | 14 | 78.57 ± 10.97   | -23.78 ± 12.42 |
| CCI-web vs. CCI-onsite <sup>b</sup>    |     | -4.59 ± 6.18 |     | -1.67 ± 6.77 |    | -18.18 ± 14.57  |                |
| CCI-web vs. usual care <sup>b</sup>    |     | -11.0 ± 6.9  |     | -3.83 ± 7.61 |    | -46.75 ± 14.79† |                |
| CCI-onsite vs. usual care <sup>b</sup> |     | -6.41 ± 6.8  |     | -2.16 ± 7.47 |    | -28.57 ± 15.29  |                |
| CCI-all vs. usual care <sup>b</sup>    |     | -8.62 ± 6.12 |     | -2.96 ± 6.74 |    | -37.66 ± 13.24† |                |

### Blood pressure medication (%)

|                                        |     |               |     |               |    |               |                |
|----------------------------------------|-----|---------------|-----|---------------|----|---------------|----------------|
| All                                    | 349 | 63.61 ± 2.58  | 291 | 63.92 ± 2.82  | 58 | 62.07 ± 6.37  | 1.85 ± 6.97    |
| CCI-all education <sup>a</sup>         | 262 | 67.18 ± 2.90  | 218 | 68.35 ± 3.15  | 44 | 61.36 ± 7.34  | 6.98 ± 7.99    |
| CCI-web <sup>a</sup>                   | 126 | 65.08 ± 4.25  | 104 | 65.38 ± 4.67  | 22 | 63.64 ± 10.26 | 1.75 ± 11.27   |
| CCI-onsite <sup>a</sup>                | 136 | 69.12 ± 3.96  | 114 | 71.05 ± 4.25  | 22 | 59.09 ± 10.48 | 11.96 ± 11.31  |
| Usual care <sup>a</sup>                | 87  | 52.87 ± 5.35  | 73  | 50.68 ± 5.85  | 14 | 64.29 ± 12.81 | -13.60 ± 14.08 |
| CCI-web vs. CCI-onsite <sup>b</sup>    |     | -4.04 ± 5.81  |     | -5.67 ± 6.31  |    | 4.55 ± 14.67  |                |
| CCI-web vs. usual care <sup>b</sup>    |     | 12.21 ± 6.83  |     | 14.70 ± 7.48* |    | -0.65 ± 16.41 |                |
| CCI-onsite vs. usual care <sup>b</sup> |     | 16.24 ± 6.66* |     | 20.37 ± 7.23† |    | -5.19 ± 16.55 |                |
| CCI-all vs. usual care <sup>b</sup>    |     | 14.30 ± 6.09* |     | 17.66 ± 6.65† |    | -2.92 ± 14.76 |                |

**ACE or ARB (%)**

|                                        |     |               |     |               |    |               |                |
|----------------------------------------|-----|---------------|-----|---------------|----|---------------|----------------|
| All                                    | 349 | 26.65 ± 2.37  | 291 | 25.09 ± 2.54  | 58 | 34.48 ± 6.24  | -9.4 ± 6.74    |
| CCI-all education <sup>a</sup>         | 262 | 29.39 ± 2.81  | 218 | 27.98 ± 3.04  | 44 | 36.36 ± 7.25  | -8.38 ± 7.86   |
| CCI-web <sup>a</sup>                   | 126 | 32.54 ± 4.17  | 104 | 30.77 ± 4.53  | 22 | 40.91 ± 10.48 | -10.14 ± 11.42 |
| CCI-onsite <sup>a</sup>                | 136 | 26.47 ± 3.78  | 114 | 25.44 ± 4.08  | 22 | 31.82 ± 9.93  | -6.38 ± 10.74  |
| Usual care <sup>a</sup>                | 87  | 18.39 ± 4.15  | 73  | 16.44 ± 4.34  | 14 | 28.57 ± 12.07 | -12.13 ± 12.83 |
| CCI-web vs. CCI-onsite <sup>b</sup>    |     | 6.07 ± 5.63   |     | 5.33 ± 6.09   |    | 9.09 ± 14.44  |                |
| CCI-web vs. usual care <sup>b</sup>    |     | 14.15 ± 5.89* |     | 14.33 ± 6.27* |    | 12.34 ± 15.99 |                |
| CCI-onsite vs. usual care <sup>b</sup> |     | 8.08 ± 5.62   |     | 9.0 ± 5.95    |    | 3.25 ± 15.63  |                |
| CCI-all vs. usual care <sup>b</sup>    |     | 11.0 ± 5.02*  |     | 11.54 ± 5.3*  |    | 7.79 ± 14.08  |                |

**Diuretics (%)**

|                                        |     |              |     |               |    |                |                 |
|----------------------------------------|-----|--------------|-----|---------------|----|----------------|-----------------|
| All                                    | 349 | 38.11 ± 2.6  | 291 | 37.11 ± 2.83  | 58 | 43.1 ± 6.5     | -5.99 ± 7.09    |
| CCI-all education <sup>a</sup>         | 262 | 40.84 ± 3.04 | 218 | 41.28 ± 3.33  | 44 | 38.64 ± 7.34   | 2.65 ± 8.06     |
| CCI-web <sup>a</sup>                   | 126 | 40.48 ± 4.37 | 104 | 41.35 ± 4.83  | 22 | 36.36 ± 10.26  | 4.98 ± 11.34    |
| CCI-onsite <sup>a</sup>                | 136 | 41.18 ± 4.22 | 114 | 41.23 ± 4.61  | 22 | 40.91 ± 10.48  | 0.32 ± 11.45    |
| Usual care <sup>a</sup>                | 87  | 29.89 ± 4.91 | 73  | 24.66 ± 5.04  | 14 | 57.14 ± 13.23  | -32.49 ± 14.16* |
| CCI-web vs. CCI-onsite <sup>b</sup>    |     | -0.7 ± 6.08  |     | 0.12 ± 6.68   |    | -4.55 ± 14.67  |                 |
| CCI-web vs. usual care <sup>b</sup>    |     | 10.59 ± 6.57 |     | 16.69 ± 6.98* |    | -20.78 ± 16.74 |                 |
| CCI-onsite vs. usual care <sup>b</sup> |     | 11.29 ± 6.47 |     | 16.57 ± 6.83* |    | -16.23 ± 16.88 |                 |
| CCI-all vs. usual care <sup>b</sup>    |     | 10.95 ± 5.77 |     | 16.63 ± 6.05† |    | -18.51 ± 15.13 |                 |

<sup>a</sup>Mean and standard deviations for continuous variables, percents and standard errors for categorical variables

<sup>b</sup>Difference between means or percentages ± 1 standard error of the difference. Significant baseline difference between means or percentages at 0.05>P≥0.01 (\*); 0.01>P≥0.001 (†); 0.001>P≥0.0001 (‡); and P<0.0001 (§).
